# Supplementary material
Source: PubMed Central journal article supplement (PMC4223473)

# AXON GUIDANCE

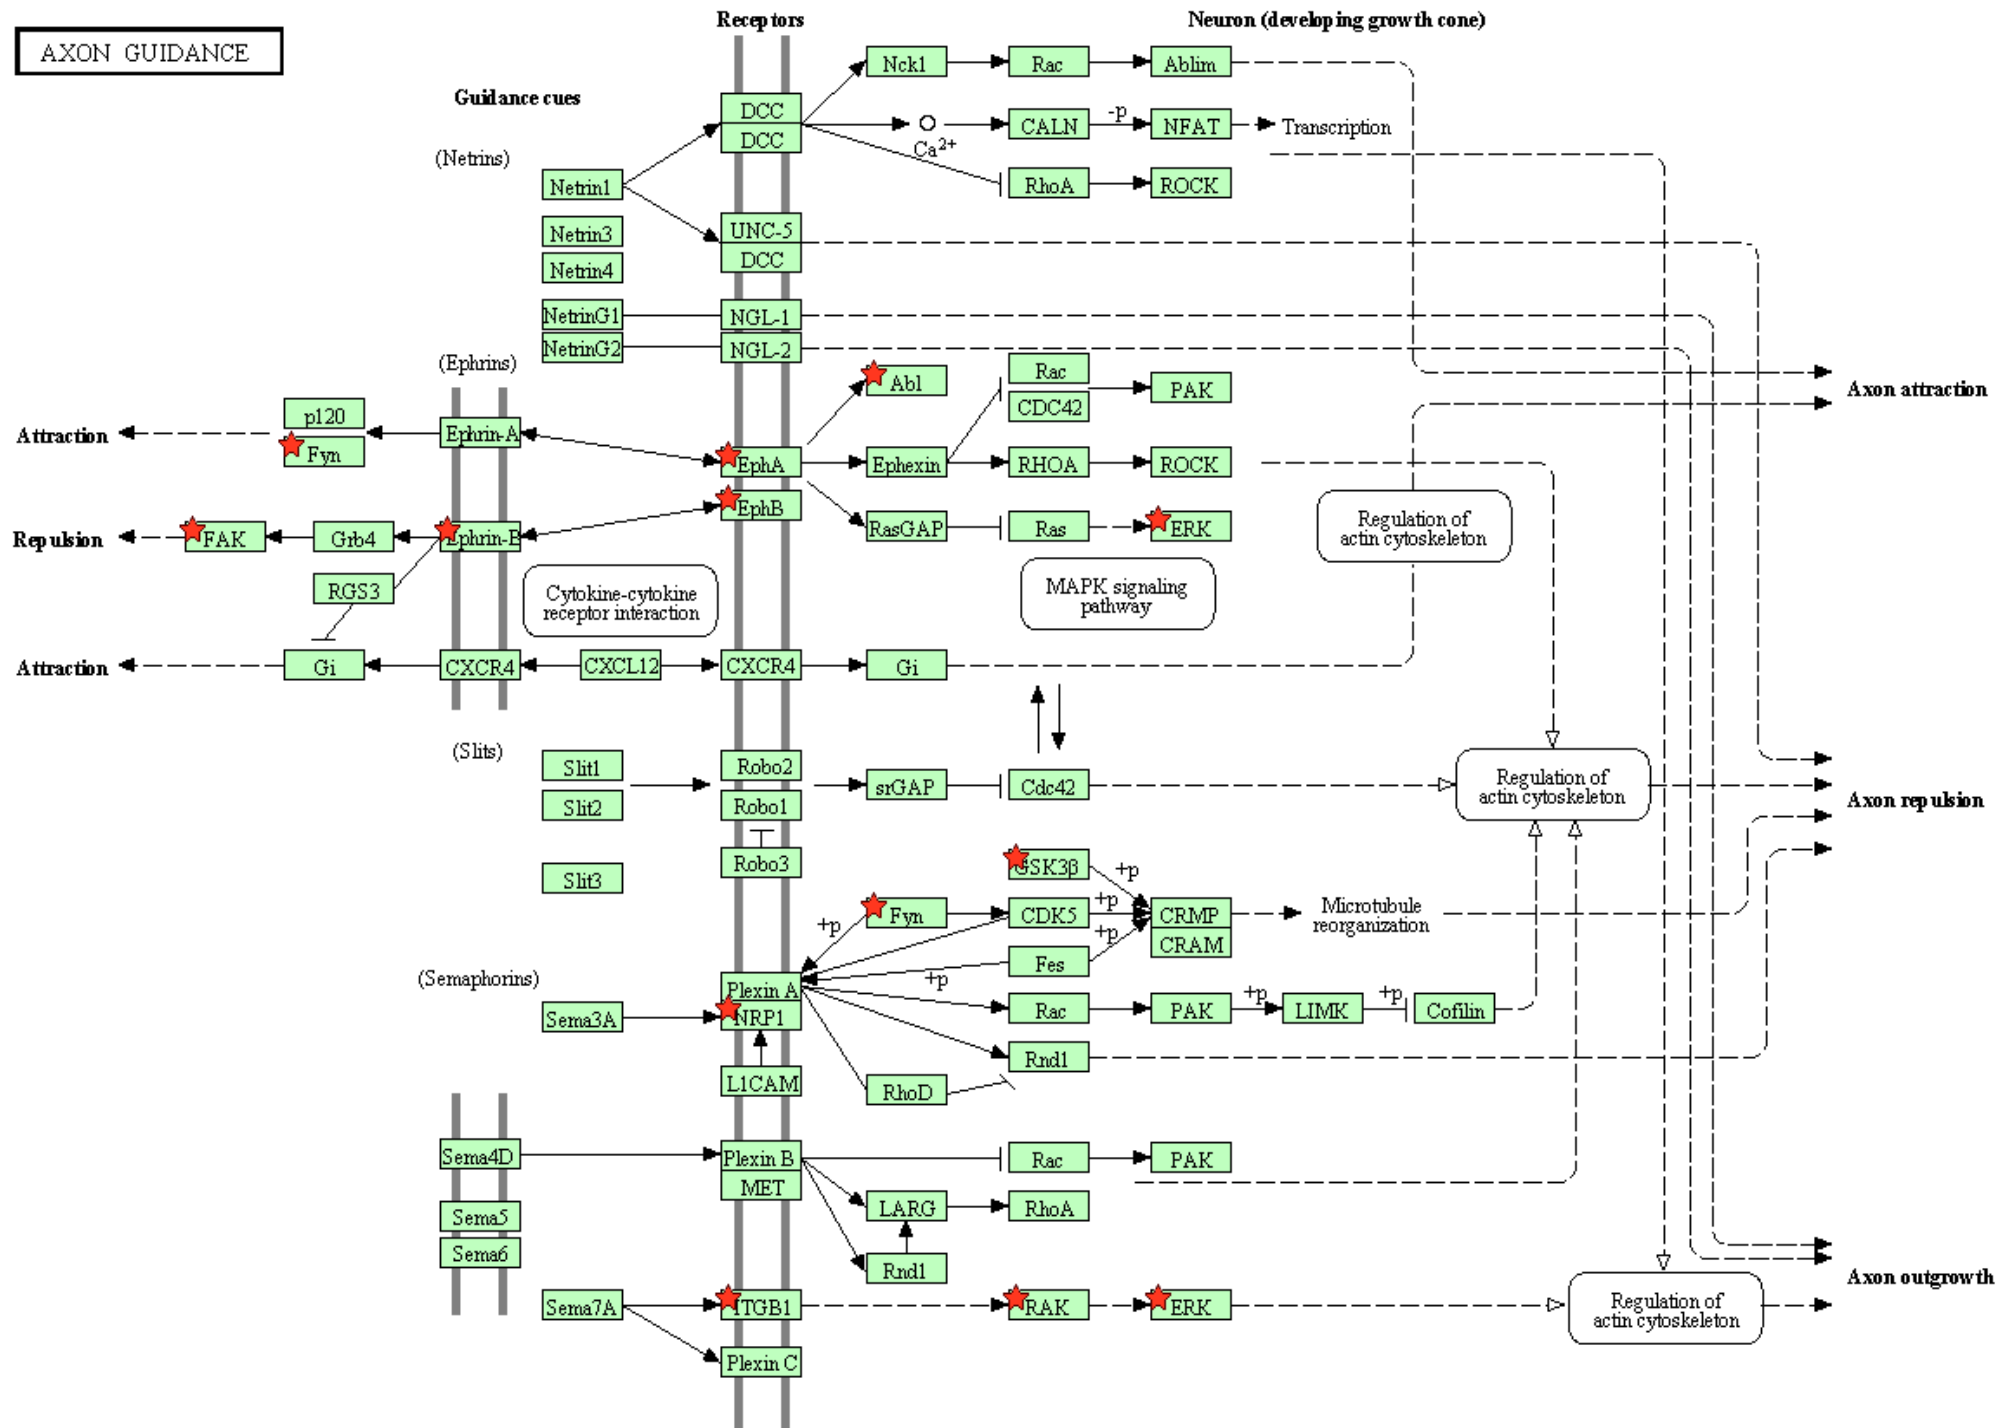

# FOCAL ADHESION

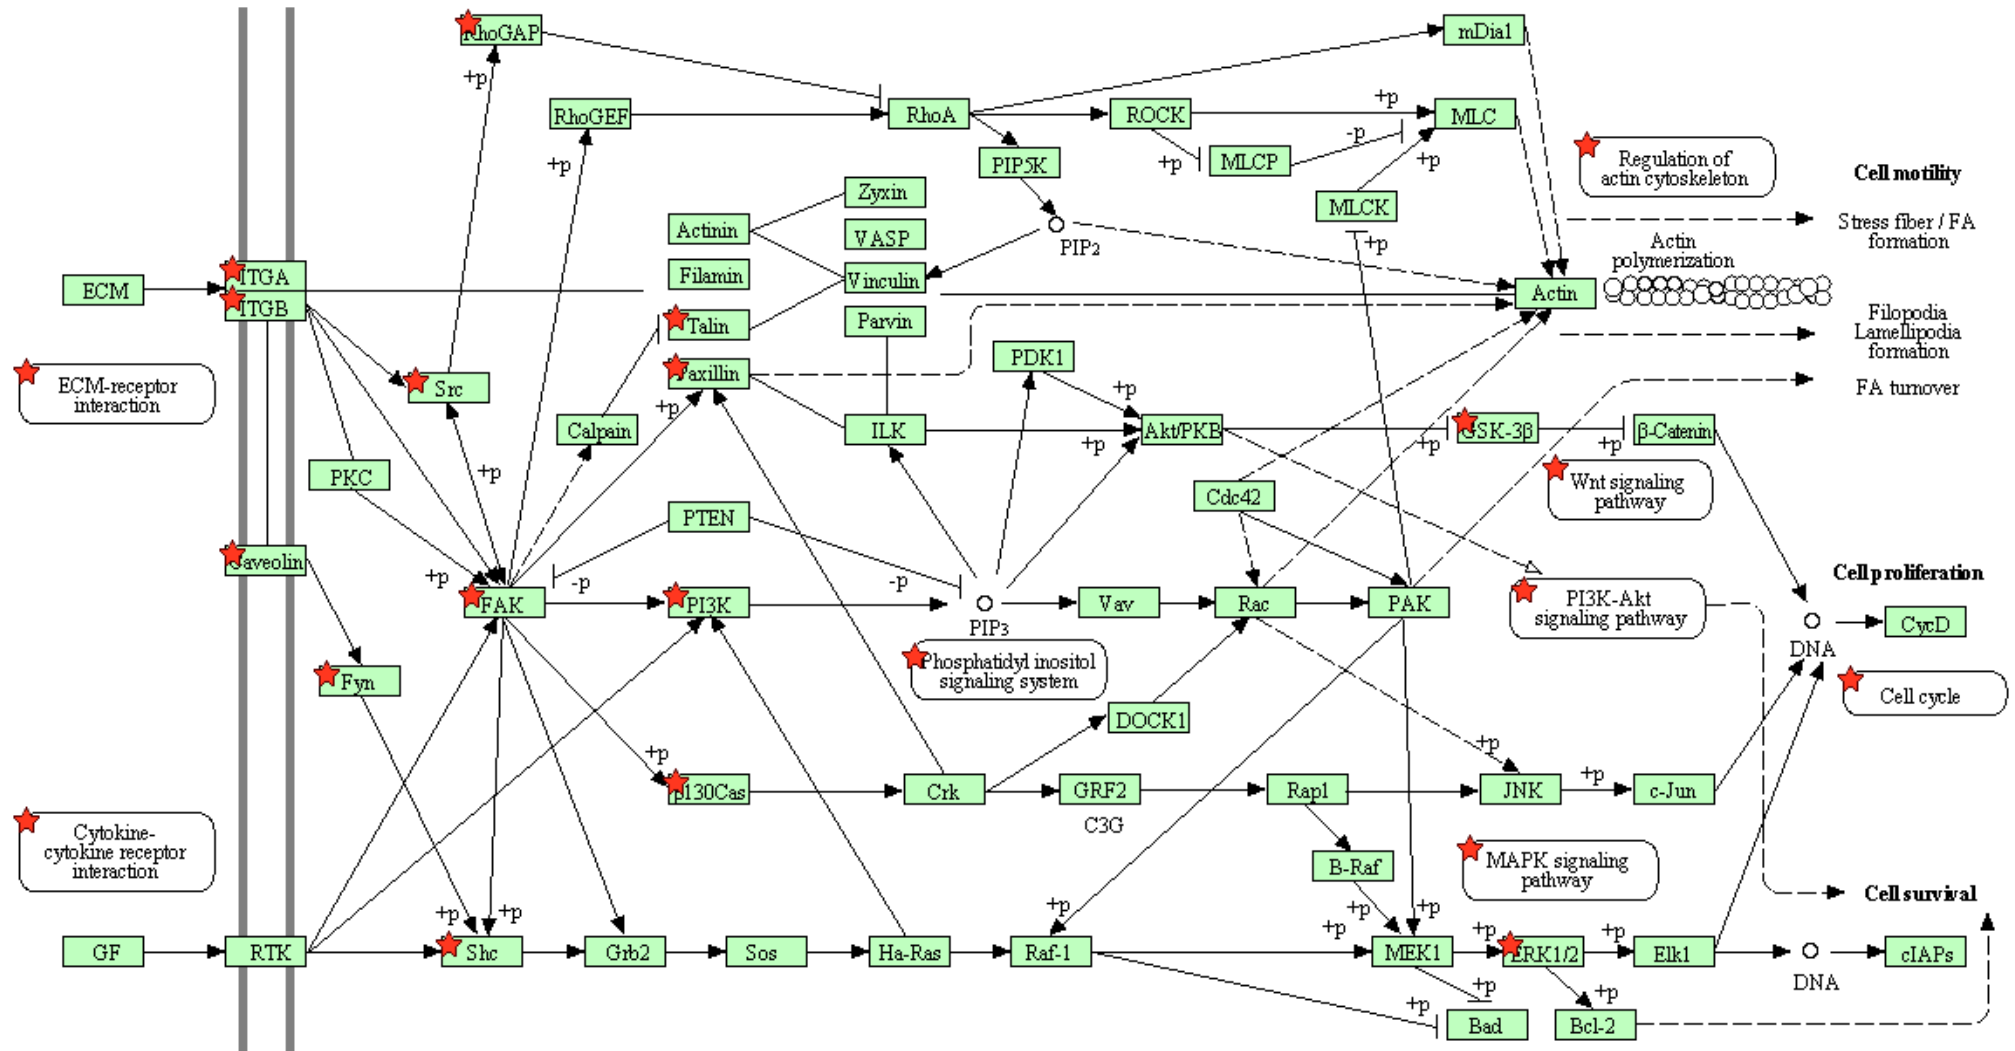

# ERBB SIGNALING PATHWAY

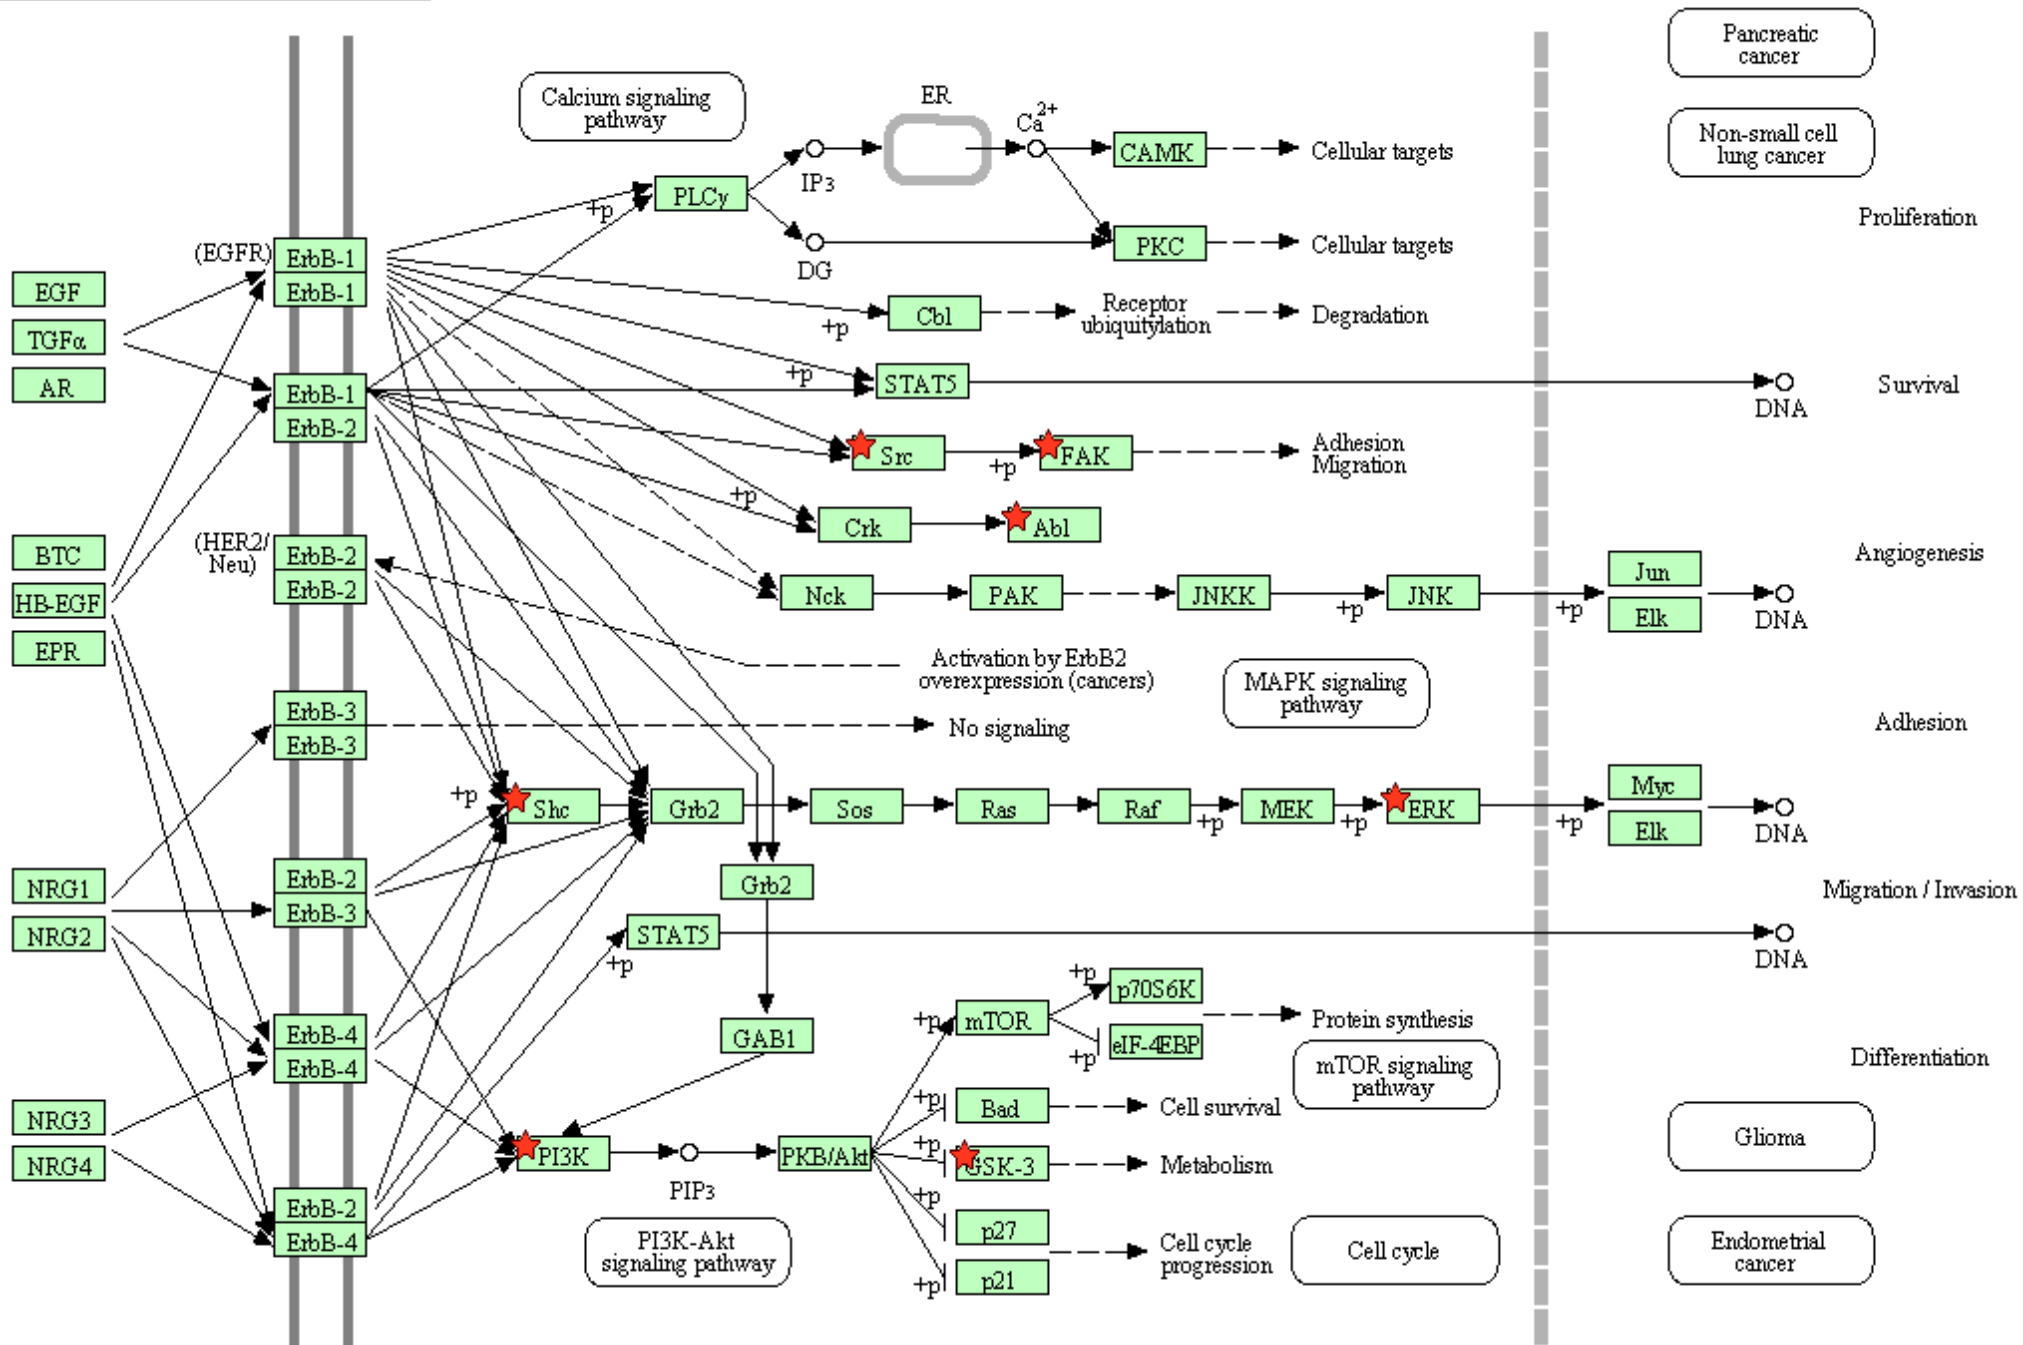

# VEGF SIGNALING PATHWAY

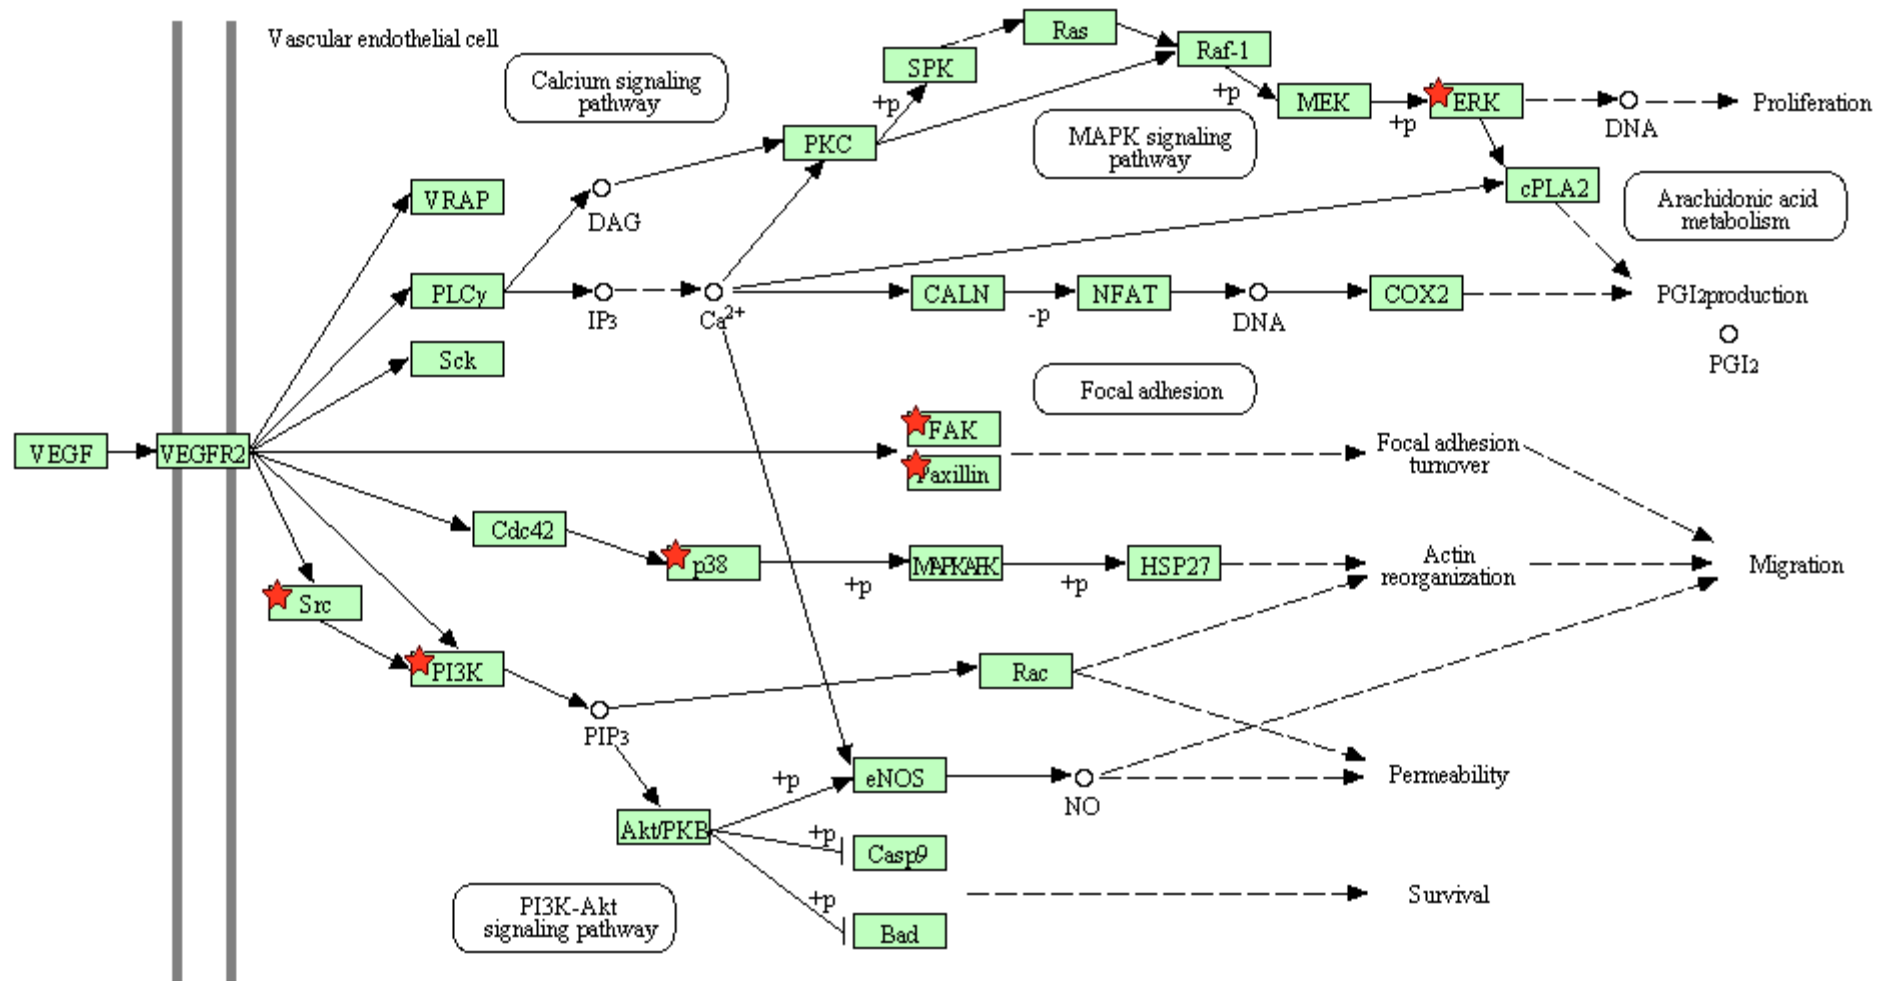

Supplement: supp_M114.038547_mcp.M114.038547-2.pdf [file supp_M114.038547_mcp.M114.038547-2.pdf]
